# Supplementary material for: Immobilization of Polyoxometalates on Tailored Polymeric Surfaces
Source: Nanomaterials (Basel). 2018 Mar 2;8(3):142. doi: 10.3390/nano8030142 (PMC5869633; doi:10.3390/nano8030142)
Supplement: Supplementary file 1 [file nanomaterials-08-00142-s001.docx]

Supporting Information

Immobilization of Polyoxometalates on Tailored Polymeric Surfaces

Saioa Aguado-Ureta 1, Juan Rodríguez-Hernández 2, Adolfo del Campo 3, Leyre Perez-Álvarez 4,5, Leire Ruiz-Rubio 4,5, José Luis Vilas 4,5,*, Beñat Artetxe 1, Santiago Reinoso 1 and
Juan M. Gutiérrez-Zorrilla 1,5,*


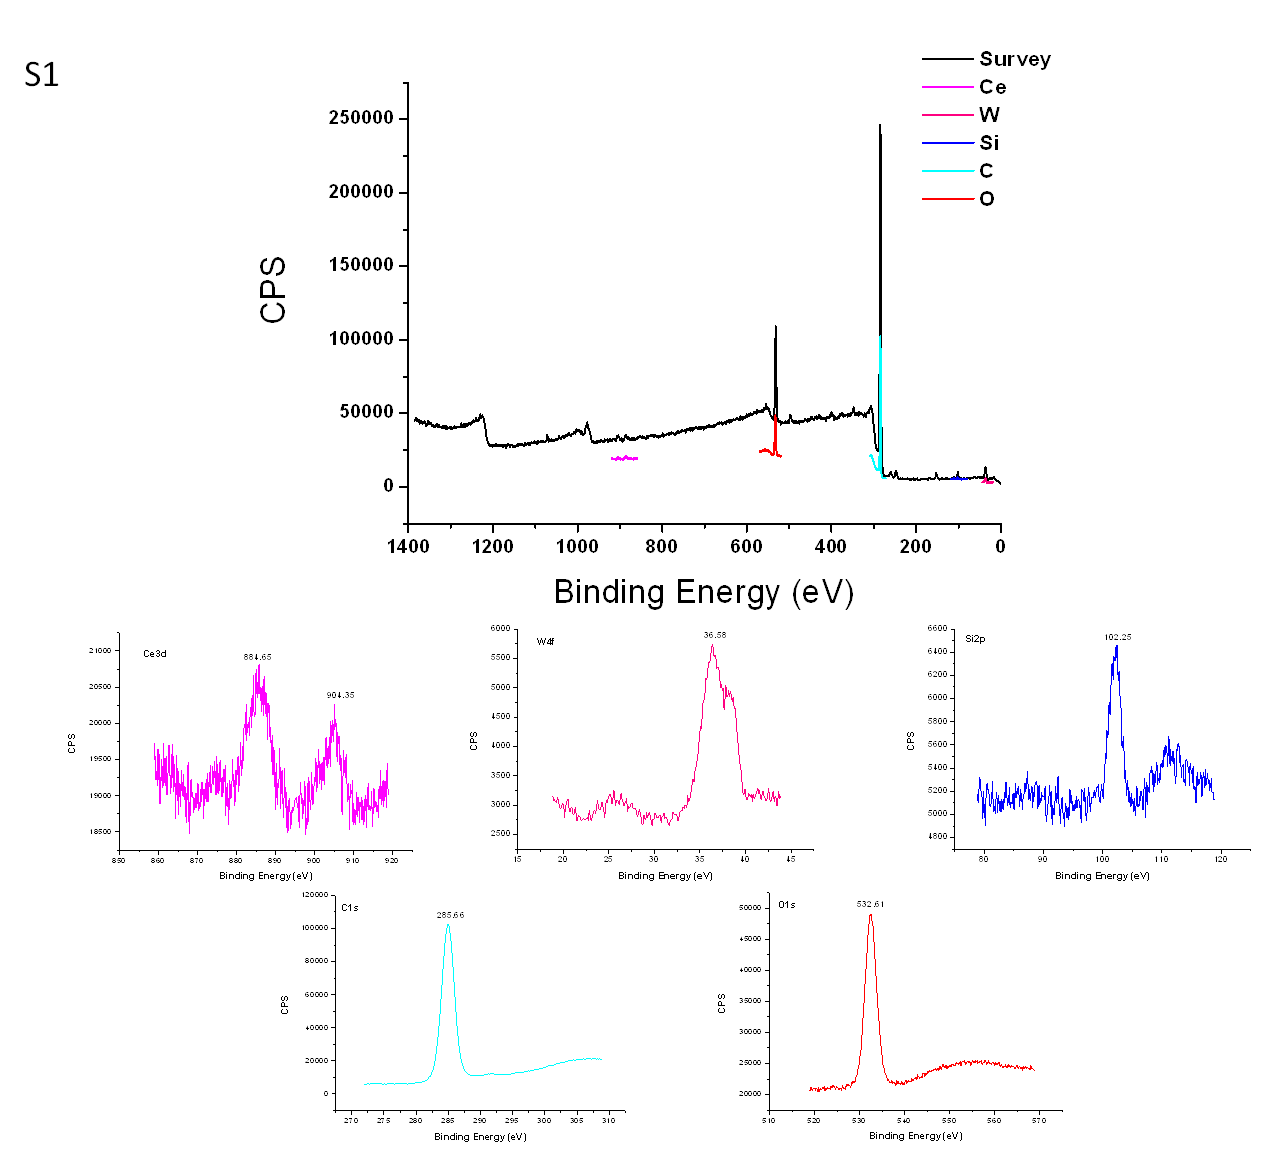


**Figure S1.** Survey and compositional XPS analysis for the hybrid S1 surface.


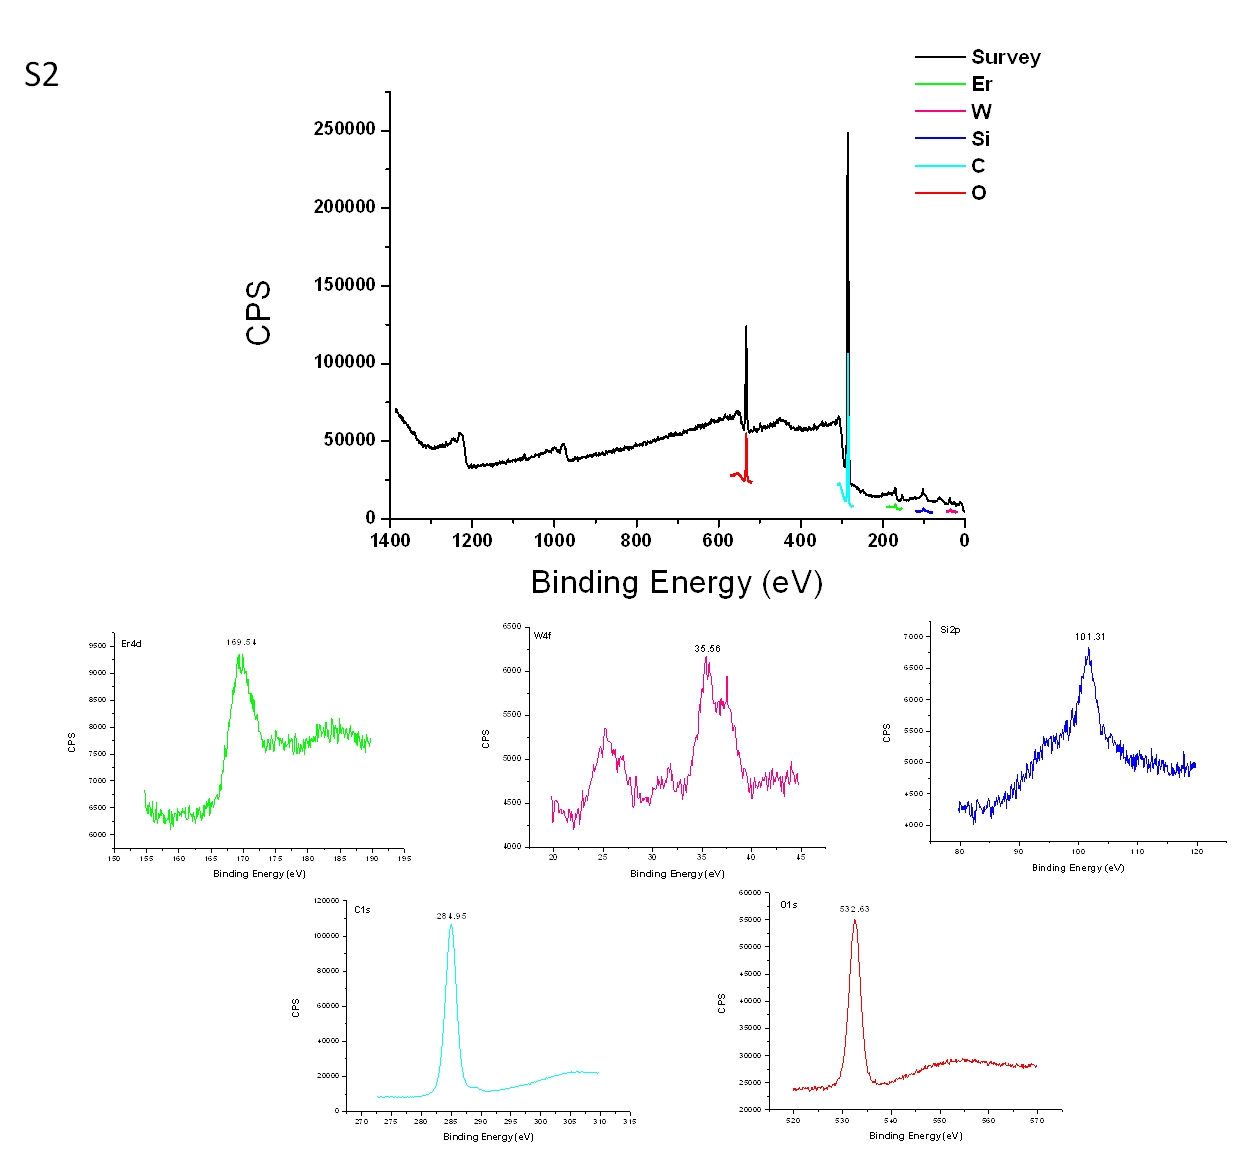


**Figure S2.** Survey and compositional XPS analysis for the hybrid S2 surface.
